# Supplementary material for: Profiling of Nutritional and Health-Related Compounds in Oat Varieties
Source: PubMed Central journal article supplement (PMC5224580; doi:10.3390/foods5010002), 2015-12-25
Supplement: foods-05-00002-s001.pdf [file foods-05-00002-s001.pdf]

# Supplementary Materials

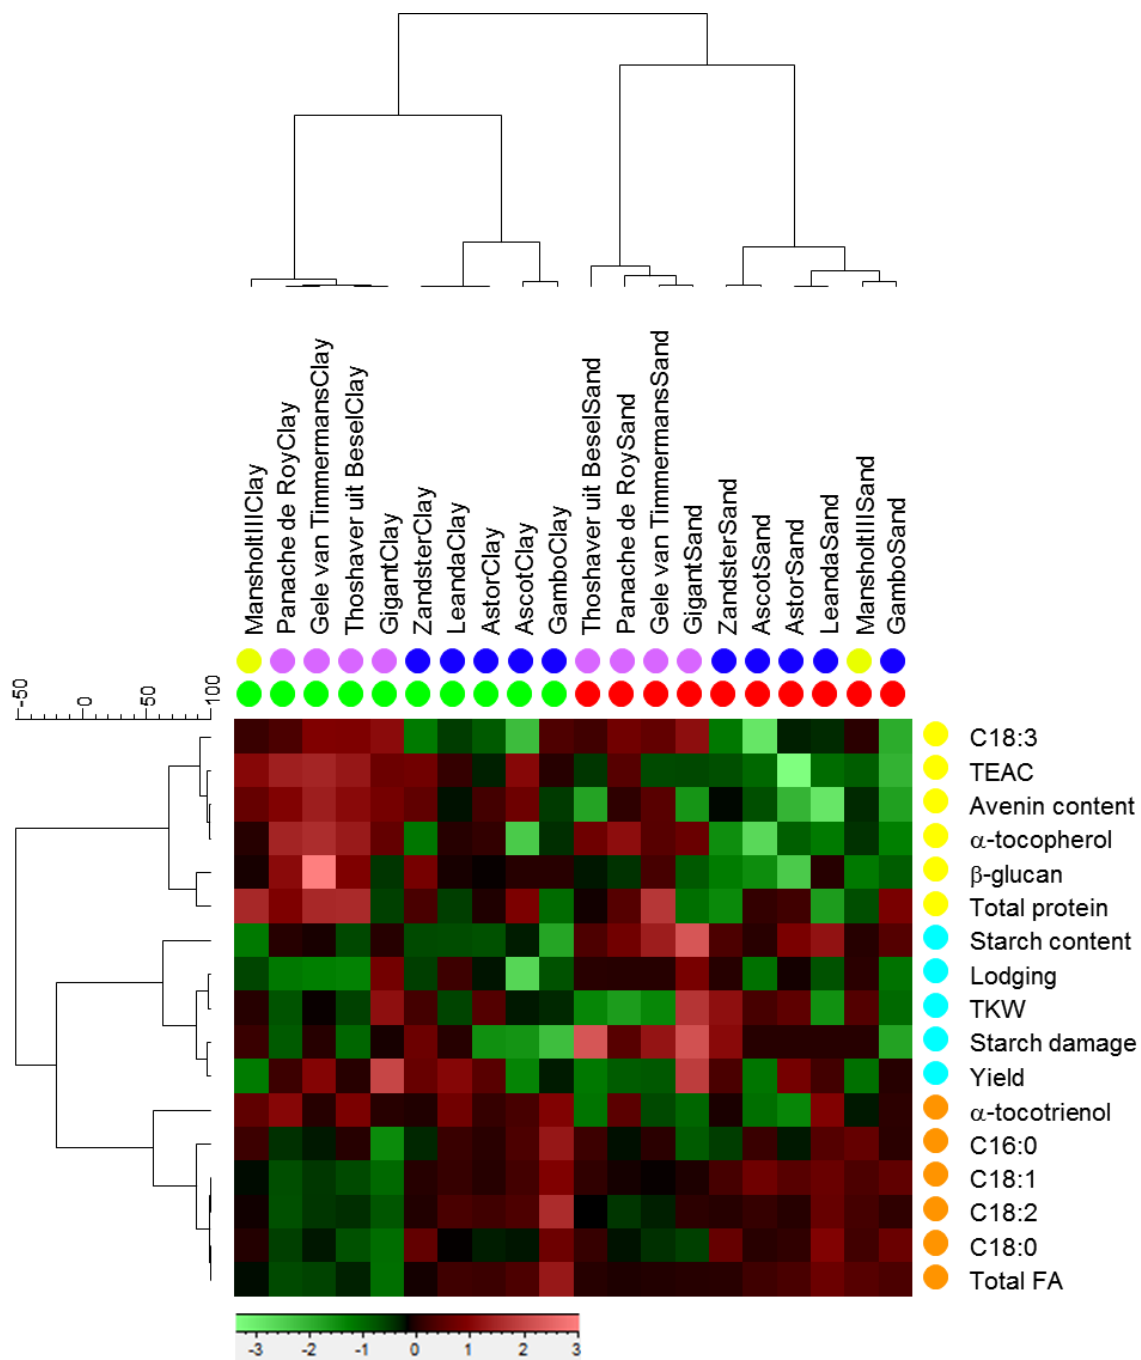

**Figure S1.** Cluster analysis showing groups identified for oat varieties (top) and compounds (right) in different colored dots.

**Table S1.** Values for health-related, nutritional compounds and field characteristics per oat variety grown in sand and clay soil.

| Variety             | Soil | Total Protein | Avenins | Starch | Starch Damage | $\beta$ -Glucan | Fatty Acids (mg/100 g) |       |       |       |       | Total FA | TEAC               | Vitamin E (mg/100g)  |                       | Yield   | TKW | Lodging |
|---------------------|------|---------------|---------|--------|---------------|-----------------|------------------------|-------|-------|-------|-------|----------|--------------------|----------------------|-----------------------|---------|-----|---------|
|                     |      | (%)           | (%)     | (%)    | (%)           | (%)             | C16:0                  | C18:0 | C18:1 | C18:2 | C18:3 | %        | ( $\mu$ mol/100 g) | $\alpha$ -Tocopherol | $\alpha$ -Tocotrienol | (kg/ha) | (g) |         |
| Ascot               | Sand | 13.3          | 0.5     | 52.4   | 2.1           | 3.6             | 245.9                  | 17.4  | 548.5 | 622.1 | 12.3  | 1.8      | 297.0              | 0.7                  | 3.0                   | 4940    | 31  | 6       |
|                     | Clay | 14.9          | 0.7     | 52.2   | 1.4           | 4.5             | 262.3                  | 17.4  | 518.6 | 662.6 | 13.3  | 1.7      | 478.6              | 0.8                  | 3.7                   | 4993    | 30  | 4       |
| Astor               | Sand | 13.9          | 0.4     | 59.7   | 2.3           | 3.3             | 241.6                  | 19.6  | 549.6 | 636.3 | 15.4  | 1.7      | 190.6              | 1.2                  | 3.0                   | 7161    | 33  | 9       |
|                     | Clay | 13.7          | 0.7     | 50.5   | 1.5           | 4.5             | 257.0                  | 18.1  | 508.1 | 666.1 | 15.0  | 1.6      | 373.6              | 1.6                  | 3.7                   | 6926    | 33  | 9       |
| Gambo               | Sand | 16.6          | 0.5     | 63.5   | 1.8           | 4.6             | 291.9                  | 33.3  | 718.1 | 730.9 | 14.7  | 2.0      | 312.1              | 1.4                  | 4.1                   | 7401    | 31  | 9       |
|                     | Clay | 13.0          | 0.7     | 47.2   | 1.4           | 4.9             | 331.1                  | 29.9  | 723.3 | 849.0 | 17.1  | 1.9      | 442.2              | 1.6                  | 4.4                   | 6650    | 32  | 9       |
| Gele van Timmermans | Sand | 15.6          | 0.6     | 59.8   | 2.9           | 4.4             | 235.2                  | 14.1  | 421.4 | 575.0 | 15.9  | 1.4      | 305.4              | 1.5                  | 3.1                   | 5071    | 25  | 8       |
|                     | Clay | 13.8          | 0.6     | 45.8   | 1.5           | 5.6             | 197.5                  | 11.0  | 312.6 | 500.3 | 15.3  | 1.2      | 395.5              | 1.6                  | 3.0                   | 5893    | 26  | 4       |
| Gigant              | Sand | 10.9          | 0.4     | 63.0   | 3.4           | 3.6             | 193.5                  | 11.5  | 385.0 | 566.2 | 16.0  | 1.4      | 278.3              | 1.4                  | 2.8                   | 7302    | 34  | 9       |
|                     | Clay | 11.6          | 0.6     | 48.9   | 1.7           | 3.8             | 178.7                  | 10.0  | 310.5 | 513.0 | 16.1  | 1.2      | 373.0              | 1.4                  | 3.2                   | 7570    | 32  | 9       |
| Leanda              | Sand | 12.1          | 0.4     | 66.5   | 2.8           | 4.9             | 292.9                  | 32.6  | 674.0 | 748.9 | 16.1  | 1.8      | 356.5              | 1.3                  | 4.4                   | 7246    | 28  | 9       |
|                     | Clay | 12.4          | 0.6     | 48.4   | 2.1           | 4.3             | 245.9                  | 16.4  | 472.4 | 637.3 | 14.8  | 1.6      | 373.1              | 1.4                  | 3.8                   | 7077    | 28  | 9       |
| Mansholt III        | Sand | 12.4          | 0.6     | 53.2   | 2.2           | 3.8             | 268.2                  | 19.6  | 515.9 | 645.9 | 15.7  | 1.6      | 314.6              | 1.3                  | 3.4                   | 5119    | 32  | 9       |
|                     | Clay | 15.5          | 0.7     | 45.6   | 2.2           | 4.3             | 246.8                  | 17.2  | 436.7 | 603.2 | 15.6  | 1.5      | 452.5              | 1.4                  | 3.7                   | 4880    | 30  | 7       |
| Panache de Roy      | Sand | 12.9          | 0.5     | 53.2   | 2.0           | 3.8             | 213.2                  | 13.1  | 385.2 | 532.3 | 15.6  | 1.3      | 351.7              | 1.6                  | 3.4                   | 4698    | 23  | 7       |
|                     | Clay | 13.8          | 0.7     | 49.5   | 1.4           | 4.7             | 210.7                  | 12.2  | 343.4 | 524.1 | 15.3  | 1.2      | 440.6              | 1.8                  | 3.7                   | 5687    | 26  | 5       |
| Troshaver uit       | Sand | 12.7          | 0.4     | 53.1   | 4.0           | 4.1             | 239.4                  | 16.8  | 444.1 | 583.2 | 15.5  | 1.4      | 316.7              | 1.6                  | 2.9                   | 4746    | 25  | 8       |
|                     | Clay | 15.0          | 0.7     | 46.8   | 1.4           | 4.7             | 228.9                  | 12.1  | 358.8 | 555.7 | 16.2  | 1.3      | 442.6              | 1.8                  | 3.7                   | 5657    | 27  | 5       |
| Zandster            | Sand | 11.5          | 0.6     | 55.5   | 3.1           | 3.8             | 228.7                  | 22.6  | 512.5 | 627.9 | 14.3  | 1.5      | 326.7              | 1.0                  | 3.5                   | 6496    | 35  | 9       |
|                     | Clay | 12.8          | 0.6     | 45.6   | 2.2           | 4.5             | 211.0                  | 17.5  | 400.9 | 568.3 | 13.5  | 1.4      | 381.0              | 0.9                  | 3.2                   | 6061    | 29  | 6       |
